# Supplementary material for: Resveratrol Induces Glioma Cell Apoptosis through Activation of Tristetraprolin
Source: PubMed Central journal article supplement — Mol Cells. 2015 Nov 4;38(11):991–7. doi: 10.14348/molcells.2015.0197 (PMC4673414; doi:10.14348/molcells.2015.0197), 2015-11-04
Supplement: molce-38-11-991-supple.pdf [file molce-38-11-991-supple.pdf]

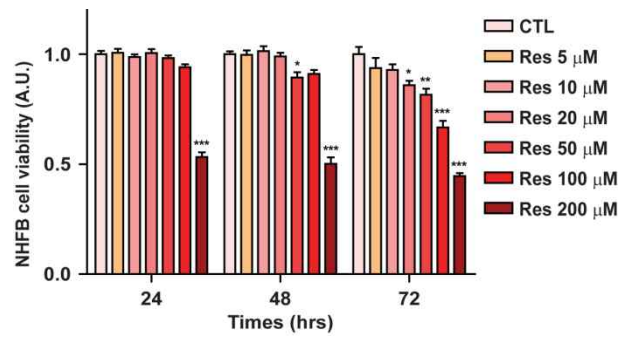

**Supplementary Figure S1.** Effects of Res on NHFB cell growth. Cells were treated with Res at the indicated concentrations for 72 hr. The MTT assay was used to determine the inhibitory effect of Res-induced TTP on cell growth. Cell survival relative to that of the control (%) is expressed as the mean  $\pm$  SEM. of eight independent experiments (\* $P$  < 0.05, \*\* $P$  < 0.01, \*\*\* $P$  < 0.001).
